# Supplementary material for: Anti-Inflammatory Effect of Chestnut Honey and Cabbage Mixtures Alleviates Gastric Mucosal Damage
Source: MDPI journal article supplement (doi:10.3390/nu16030389), 2024-01-29
Supplement: s1 [file s1]

**Table S1.** Calibration curves of standards KA and SA.

| Compound | $t_R$ | Range (mg/mL)   | Calibration equation   | $r^2$  |
|----------|-------|-----------------|------------------------|--------|
| KA       | 12.8  | 0.0625 – 1.0000 | $Y = 35.518X + 656.1$  | 0.9990 |
| SA       | 22.2  | 0.0009 – 0.0156 | $Y = 37.317X + 8.0685$ | 0.9992 |

**KA**, kynurenic acid; **SA**, sinapic acid; **Y**, peak area; **X**, concentration of standards ( $\mu\text{g/mL}$ );  $r^2$ , correlation coefficient based on three data points in the calibration curves.

**Table S2.** Content of standards KA and SA in MCHCB 1–4.

| Sample  | KA Content (mg/g mix.) | SA Content (mg/g mix.) |
|---------|------------------------|------------------------|
| MCHCB 1 | $2.77 \pm 0.01$        | ND                     |
| MCHCB 2 | ND                     | $0.006 \pm 0.001$      |
| MCHCB 3 | $0.21 \pm 0.01$        | $0.007 \pm 0.001$      |
| MCHCB 4 | $0.44 \pm 0.01$        | $0.015 \pm 0.001$      |

**KA**, kynurenic acid; **SA**, sinapic acid; **MCHCB**, chestnut honey (CH) and cabbage (CB) single or in combination; **MCHCB 1**, CH; **MCHCB 2**, CB; **MCHCB 3**, CH+CB 1:9; **MCHCB 4**, kynurenic acid increased CH+CB 1:9; **ND**, not detected.

**Figure S1**

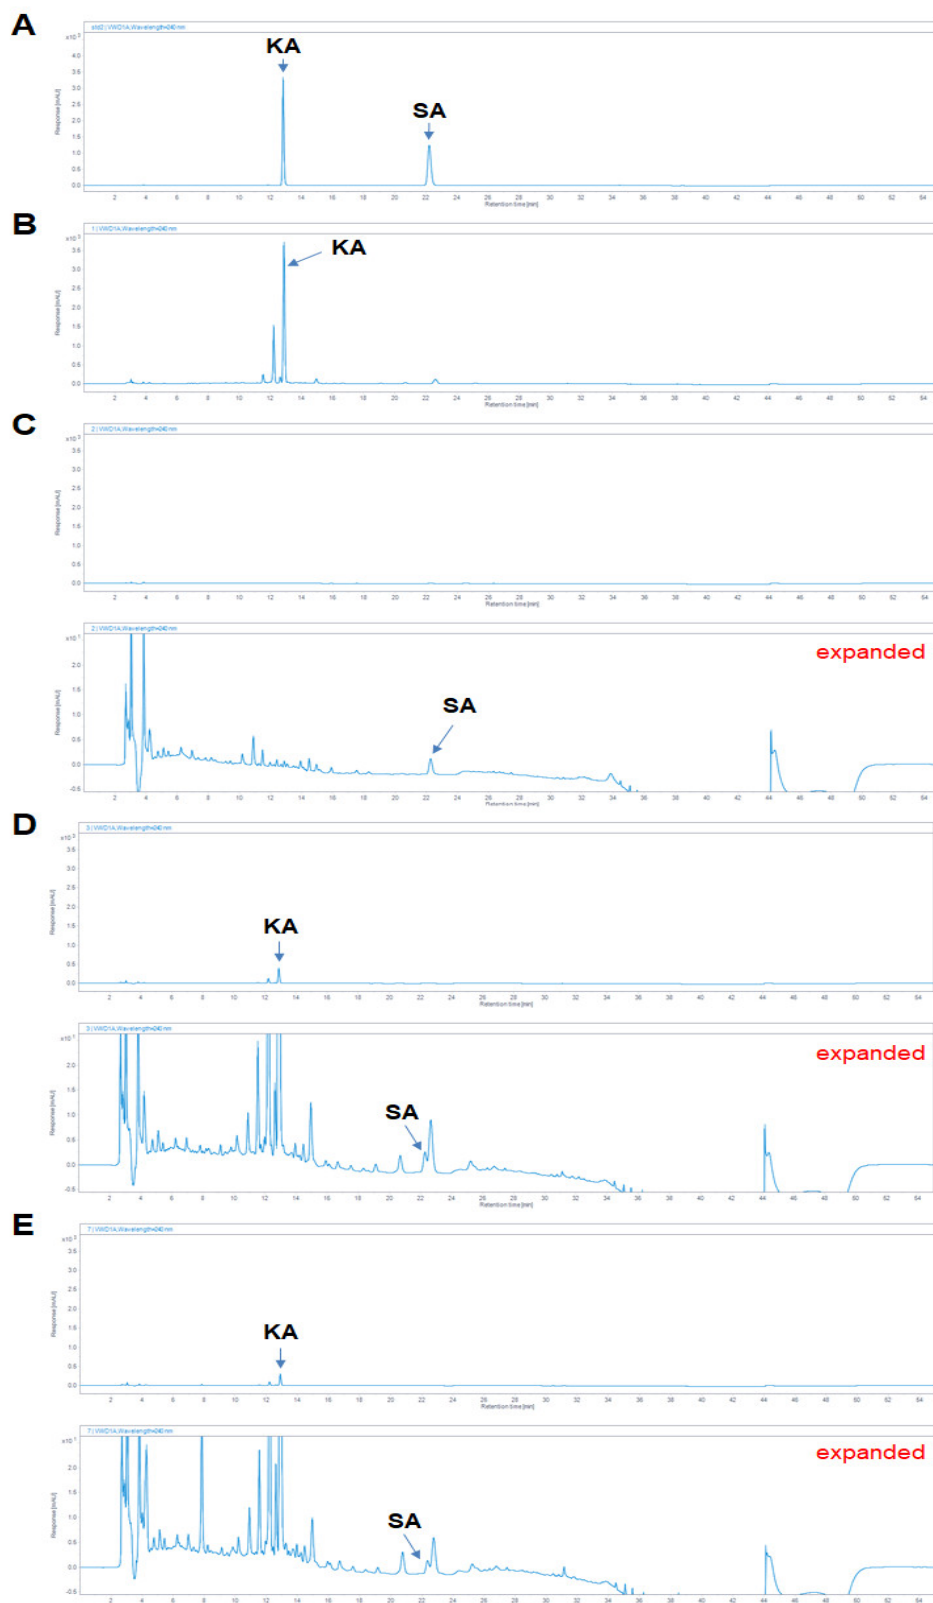

**Figure S1.** HPLC-VWD analysis of MCHCB 1–4. Infographic for HPLC-VWD analysis of (A) the standard (KA and SA) and (B–E) MCHCB 1–4. MCHCB, chestnut honey (CH) and cabbage (CB) single or in combination; MCHCB 1, CH; MCHCB 2, CB; MCHCB 3, CH+CB 1:9; MCHCB 4, kynurenic acid increased CH+CB 1:9; KA, kynurenic acid; SA, sinapic acid.

**Figure S2**

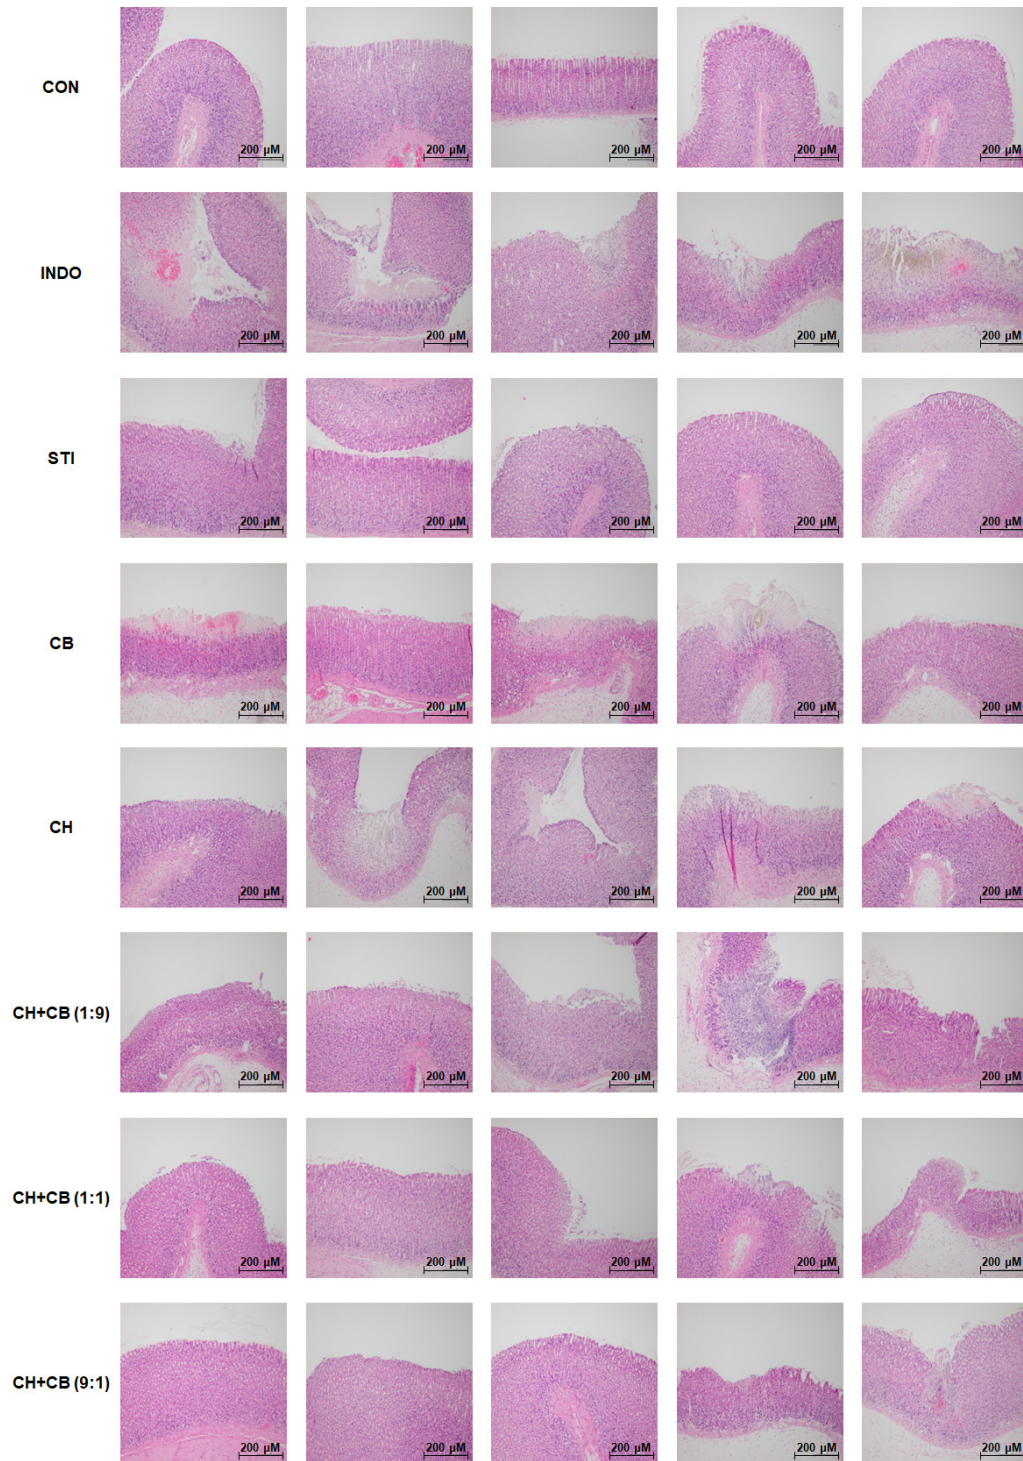

**Figure S2.** Histological analysis of first animal experiment. For histopathological inspection, H&E-stained gastric mucosal sections were observed under an Olympus BX53 microscope (original magnification  $\times 100$ ,  $n = 5$ ). **CON**, control group; **INDO**, indomethacin-induced rats (80 mg/kg, p.o.); **STI**, INDO-induced rats with Stiller® (100 mg/kg, p.o.); **CB**, INDO-induced rats with cabbage (4.5 g/kg, p.o.); **CH**, INDO-induced rats with chestnut honey (0.5 g/kg, p.o.); **CH+CB**, INDO-induced rats with mixture of CH and CB (5 g/kg, p.o.).



**Figure S3**

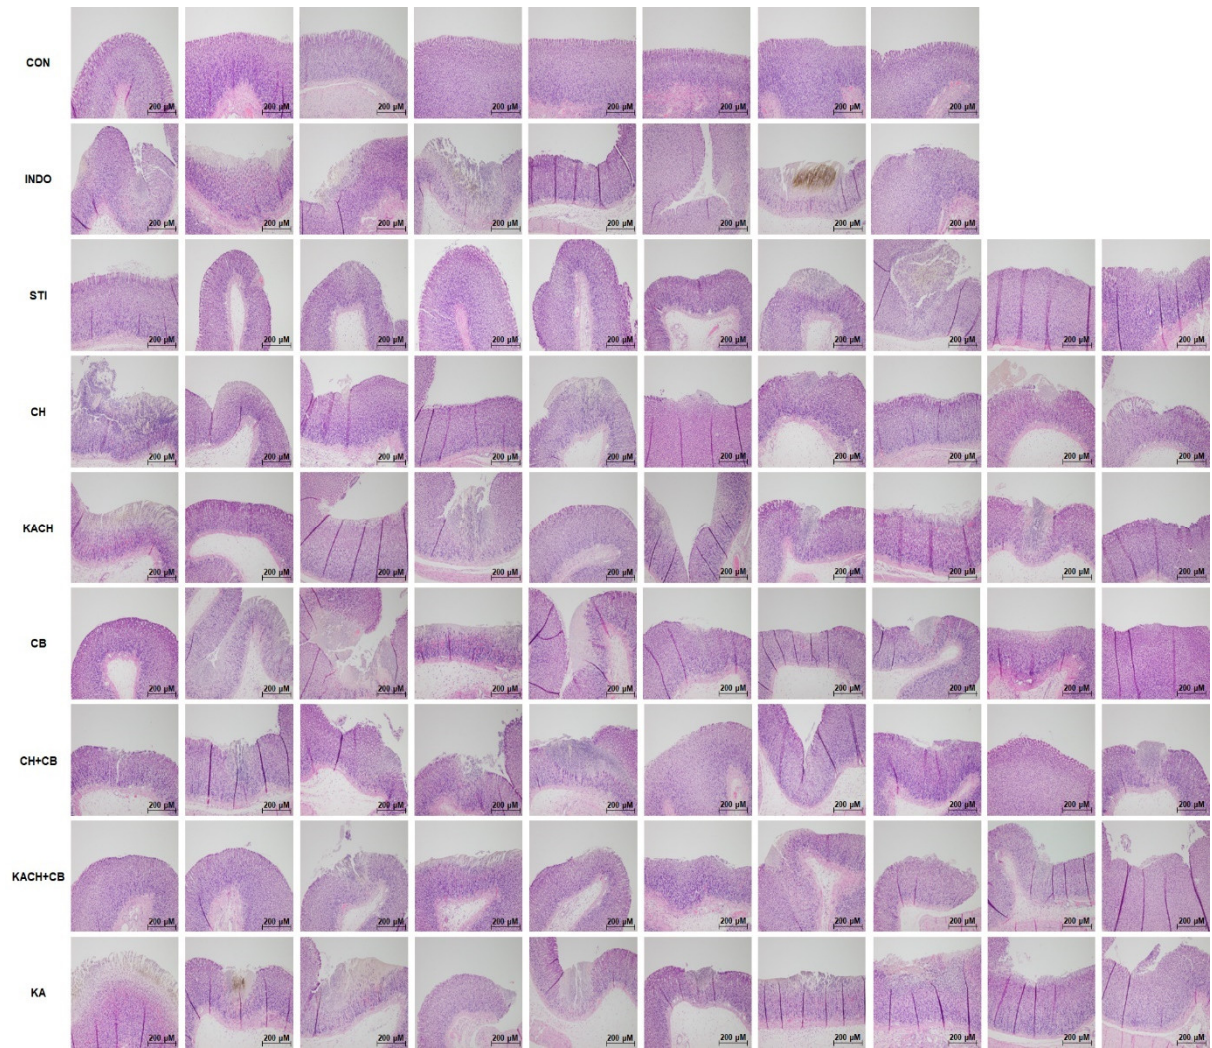

**Figure S3.** Histological analysis of second animal experiment. For histopathological inspection, H&E-stained gastric mucosal sections were observed under an Olympus BX53 microscope (original magnification  $\times 100$ ,  $n = 8-10$ ). **CON**, control group; **INDO**, indomethacin-induced rats (80 mg/kg, p.o.); **STI**, INDO-induced rats with Stiller® (100 mg/kg, p.o.); **CH**, INDO-induced rats with chestnut honey (1.5 g/kg, p.o.); **KACH**, INDO-induced rats with kynurenic acid increased CH (1.5 g/kg, p.o.); **CB**, INDO-induced rats with cabbage (13.5 g/kg, p.o.); **CH+CB**, INDO-induced rats with mixture of CH and CB (15 g/kg, p.o.); **KACH+CB**, INDO-induced rats with mixture of KACH and CB (15 g/kg, p.o.); **KA**, INDO-induced rats with kynurenic acid (1.5 mg/kg, p.o.).
